# Supplementary material
Source: PubMed Central journal article supplement (PMC4822670)
Supplement: CJN.08110715_CJN08110715SupplementaryData.pdf [file CJN.08110715_CJN08110715SupplementaryData.pdf]

Supplemental Material

**Table S1:** Comparison of study participants within the development cohort who progressed towards end-stage renal disease with study participants with event-free survival

|                                    | Total cohort | Progression to ESRD | No progression to ESRD | P      |
|------------------------------------|--------------|---------------------|------------------------|--------|
| Age (years)                        | 64.6 ± 12.6  | 64.1 ± 13.5         | 64.7 ± 12.5            | 0.72   |
| Gender (female)                    | 168 (41.7 %) | 15 (28.8 %)         | 153 (43.6 %)           | 0.05   |
| Diabetes mellitus                  | 150 (37.2 %) | 26 (50.0 %)         | 124 (35.3 %)           | 0.05   |
| Current Smoker                     | 38 (9.4 %)   | 4 (7.7 %)           | 34 (9.7 %)             | 0.80   |
| Albuminuria (mg/g creatinine)      | 32 (7; 194)  | 437 (126; 1923)     | 23 (6; 106)            | <0.001 |
| eGFR (ml/min/1.73 m <sup>2</sup> ) | 45.8 ± 16.0  | 28.1 ± 12.3         | 48.9 ± 14.5            | <0.001 |
| BMI (kg/m <sup>2</sup> )           | 30.2 ± 5.5   | 29.4 ± 5.5          | 30.3 ± 5.5             | 0.24   |
| BP sys (mmHg)                      | 154 ± 23     | 160 ± 23            | 153 ± 23               | 0.03   |
| BP diast (mmHg)                    | 87 ± 12      | 87 ± 14             | 87 ± 12                | 0.72   |
| BP mean (mmHg)                     | 110 ± 14     | 111 ± 14            | 109 ± 14               | 0.33   |
| HF (beats/min)                     | 66 ± 11      | 67 ± 12             | 66 ± 11                | 0.49   |
| RRI                                | 74 ± 9       | 79 ± 8              | 73 ± 8                 | <0.001 |
| SRI                                | 65 ± 8       | 68 ± 9              | 65 ± 8                 | 0.01   |
| DI-RISK                            | 8 ± 5        | 10 ± 5              | 8 ± 5                  | <0.001 |

eGFR: estimated glomerular filtration rate; BMI: body mass index; BP sys: systolic blood pressure; BP diast: diastolic blood pressure; BP mean: mean blood pressure; HF: heart rate; RRI: renal resistive index; SRI: splenic resistive index; DI-RISK: difference of resistive indices in spleen and kidney

**Table S2:** Comparison of study participants within the validation cohort who progressed towards end-stage renal disease with study participants with event-free survival

|                                    | Total cohort | Progression to ESRD | No progression to ESRD | P      |
|------------------------------------|--------------|---------------------|------------------------|--------|
| Age (years)                        | 49.8 ± 16.4  | 58.2 ± 18.0         | 48.4 ± 15.7            | 0.01   |
| Gender (female)                    | 67 (41.4 %)  | 8 (34.8 %)          | 59 (42.4 %)            | 0.65   |
| Diabetes mellitus                  | 21 (13.0 %)  | 5 (21.7 %)          | 16 (10.1 %)            | 0.19   |
| Albuminuria (mg/g creatinine)      | 57 (32; 318) | 732 (436; 1463)     | 53 (28; 102)           | <0.001 |
| eGFR (ml/min/1.73 m <sup>2</sup> ) | 80.2 ± 47.6  | 18.0 ± 10.0         | 90.5 ± 43.3            | <0.001 |
| BMI (kg/m <sup>2</sup> )           | 26.0 ± 4.5   | 27.1 ± 5.6          | 25.8 ± 4.3             | 0.20   |
| BP sys (mmHg)                      | 164 ± 26     | 175 ± 19            | 162 ± 27               | 0.03   |
| BP diast (mmHg)                    | 97 ± 15      | 98 ± 16             | 97 ± 14                | 0.71   |
| BP mean (mmHg)                     | 119 ± 17     | 124 ± 15            | 119 ± 17               | 0.18   |
| RRI                                | 68 ± 10      | 79 ± 9              | 66 ± 8                 | <0.001 |

eGFR: estimated glomerular filtration rate; BMI: body mass index; BP sys: systolic blood pressure; BP diast: diastolic blood pressure; BP mean: mean blood pressure; RRI: renal resistive index.

**Equation:** Three year risk prediction of KFRE index + RRI

$$P = 1 - S_0(t = 3\text{years})^{\exp(f(x))}$$

$$\text{where } f(x) = \beta_1(x_1 - \bar{x}_1) + \beta_2(x_2 - \bar{x}_2)$$

and  $\beta_1$  represents the beta coefficient of the KFRE Index,  $\beta_2$  the beta coefficient of RRI/5,  $\bar{x}_1$  the mean KFRE Index,  $\bar{x}_2$  the mean RRI/5,  $x_1$  the individual patient KFRE Index (see equation 1 of the manuscript), and  $x_2$  the RRI/5 of the individual patient.

In our cohort  $S_0(t = 3\text{ years}) = 0.989$  so the final three year risk prediction of an individual was:

$$P = 1 - 0.989^{\exp[0.861*(KFRE\ Index - (-4.752)) + 0.332*(RRI/5 - 14.74)]}$$
